# Supplementary material for: Chinese herbal medicine for the treatment of primary hypertension: a methodology overview of systematic reviews
Source: Springer Nature journal article supplement (doi:10.1186/s13643-016-0353-y), 2016-10-19
Supplement: MOESM1 [file 10918254]

#### Pubmed

- #1 "Hypertension"[Mesh]
- #2 "Cochrane database of systematic reviews"[Journal]
- #3 search[Text Word]
- #4 meta-analysis[Publication Type]
- #5 Medline[Text Word]
- #6 systematic review[Text Word]
- #7 #2 OR #3 OR #4 OR #5 OR #6
- #8 "Medicine, Chinese Traditional"[Mesh]
- #9 "Complementary Therapies"[Mesh]
- #10 #9 OR #8
- #11 #10 AND #7 AND #1

#### Embase:

- #1 'Medicine, Chinese Traditional'/exp
- #2 'alternative medicine'/exp
- #3 #1 OR #2
- #4 'meta analysis'/exp
- #5 review.pt.
- #6 search.tw.
- #7 #4 OR #5 OR #6
- #8 'hypertension'/exp
- #9 #3 AND #7 AND #8

#### Cochrane Library

- #1 MeSH descriptor: [Medicine, Chinese Traditional] explode all trees
- #2 MeSH descriptor: [Complementary Therapies] explode all trees
- #3 #1 OR #2
- #4 MeSH descriptor: [Hypertension] explode all trees
- #5 #3 AND #4

#### CBM

- #1 "Meta 分析"[不加权:扩展]
- #2 "系统评价"[常用字段:智能]
- #3 "荟萃分析"[常用字段:智能]
- #4 #1 OR #2 OR #3
- #5 "高血压"[不加权:扩展]
- #6 #5 AND #4

#### CNKI

- #1 主题 meta
- #2 主题 荟萃分析

#3 主题 系统评价

#4 #1 OR #2 OR #3

#5 高血压

#6 #4 AND #5

Wanfang

#1 主题 meta

#2 主题 荟萃分析

#3 主题 系统评价

#4 #1 OR #2 OR #3

#5 高血压

#6 #4 AND #5
